# Supplementary material for: On the functional diversity of dynamical behaviour in genetic and metabolic feedback systems
Source: Springer Nature journal article supplement (doi:10.1186/1752-0509-3-51), 2009-05-11

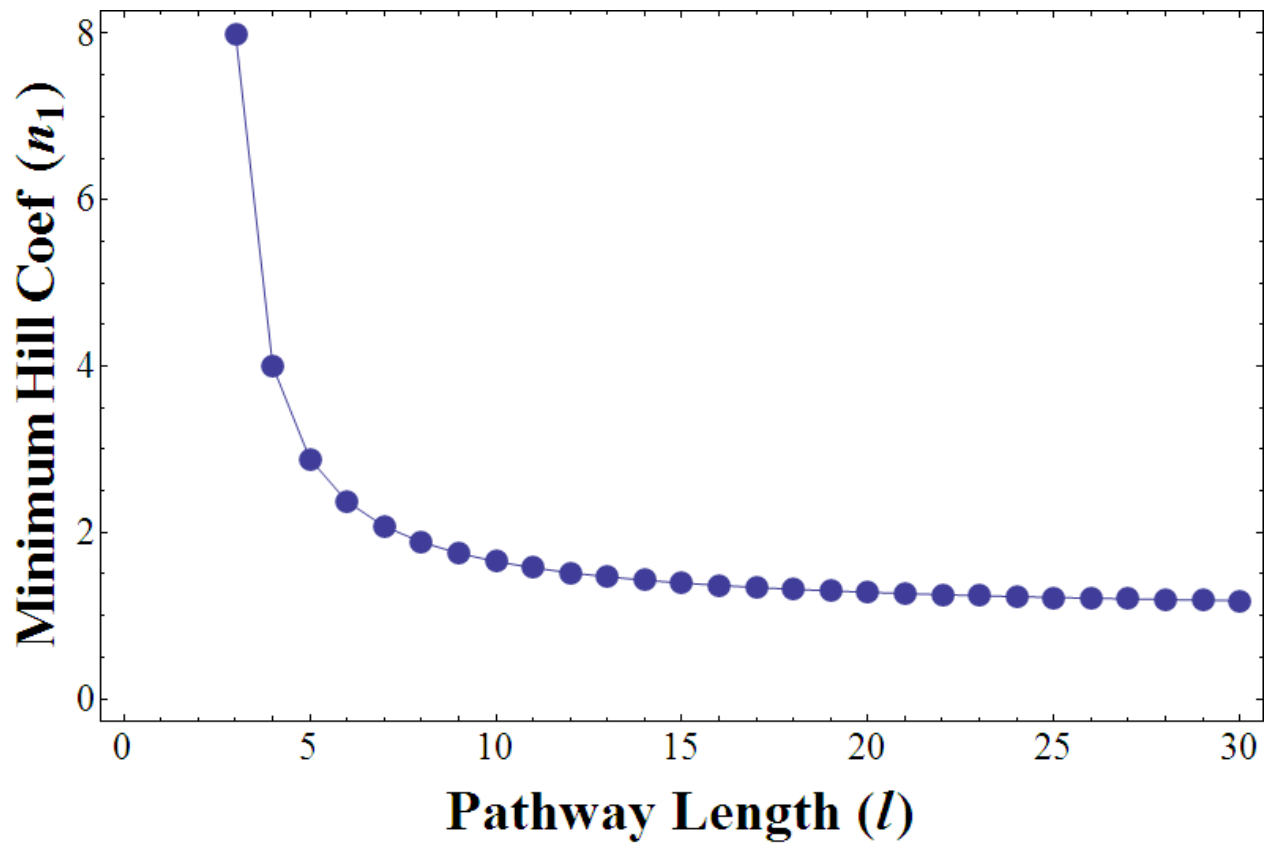

Supplement: 12918_2008_319_MOESM7_ESM.pdf [file 12918_2008_319_MOESM7_ESM.pdf]
